# Supplementary material for: Direct amination of benzene to aniline by reactive distillation method over copper doped hierarchical TS-1 catalyst
Source: Royal Society of Chemistry journal article supplement (doi:10.1039/c3cy00568b), 2013-10-02
Supplement: c3cy00568b.pdf [file c3cy00568b.pdf]

# Direct Amination of Benzene to Aniline by Reactive Distillation Method over Copper Doped Hierarchical TS-1 Catalyst

Tianhua Yu,<sup>a,b</sup> Qian Zhang,<sup>a</sup> Sheng Xia,<sup>a</sup> Guiying Li<sup>\*a</sup> and Changwei Hu<sup>\*a</sup>

<sup>a</sup> Key Laboratory of Green Chemistry and Technology, Ministry of Education, College of Chemistry, Sichuan University, 29 Wangjiang Road, Chengdu, Sichuan, 610064, China

<sup>b</sup> School of life sciences, Guizhou Normal University, 116 Baoshan North Road, Guiyang 550001, China

## Supporting Information

### A. Supplemental Tables

**Table S1. The effect of the amount of H<sub>2</sub>O<sub>2</sub> on the yield and selectivity of products**

| Entry | Molar ratio <sup>a</sup> | Y (mol%) |        |     | Conversion of benzene (%) | Selectivity to aniline (%) |
|-------|--------------------------|----------|--------|-----|---------------------------|----------------------------|
|       |                          | Aniline  | Phenol | DHB |                           |                            |
| 1     | 0.7                      | 2.2      | 0.3    | 0.2 | 4.1 (2.7) <sup>b</sup>    | 80.9                       |
| 2     | 1.4                      | 2.6      | 0.8    | 0.0 | 4.7 (3.4)                 | 76.3                       |
| 3     | 2.8                      | 6.0      | 0.9    | 0.5 | 8.6 (7.4)                 | 80.5                       |
| 4     | 4.2                      | 6.1      | 1.1    | 0.4 | 9.0 (7.6)                 | 80.1                       |
| 5     | 5.5                      | 7.5      | 1.3    | 0.5 | 10.8 (9.3)                | 80.0                       |
| 6     | 6.9                      | 8.2      | 1.1    | 0.6 | 11.3 (9.9)                | 82.6                       |
| 7     | 8.2                      | 6.8      | 1.3    | 0.5 | 10.0 (8.6)                | 79.5                       |
| 8     | 9.4                      | 6.4      | 1.3    | 0.5 | 9.7 (8.2)                 | 77.8                       |
| 9     | 10.7                     | 6.4      | 1.8    | 1.0 | 10.3 (9.2)                | 69.4                       |

Reaction condition: 1.00 g, 2.5 wt % Cu/h-TS-1, 2.82 mmol C<sub>6</sub>H<sub>6</sub>,  $n_{\text{NH}_3 \cdot \text{H}_2\text{O}} / n_{\text{C}_6\text{H}_6} = 40$  (molar feed ratio in the reaction zone), 40.00 ml H<sub>2</sub>O, reaction temperature: 70°C, reboiler temperature: 85°C.

Molar ratio<sup>a</sup> is molar feed ratio of hydrogen peroxide to benzene in the reaction zone.

<sup>b</sup> Value calculated by (Mole amounts of aniline+ Phenol + DHB + Nitrobenzene) × Initial mole amount of benzene<sup>-1</sup> × 100%

**Table S2. The effect of the amount of NH<sub>3</sub>·H<sub>2</sub>O on the yield and selectivity of products**

| Entry | Molar ratio <sup>a</sup> | Y (mol%) |        |     | Conversion of benzene (%) | Selectivity to aniline (%) |
|-------|--------------------------|----------|--------|-----|---------------------------|----------------------------|
|       |                          | Aniline  | Phenol | DHB |                           |                            |
| 1     | 18.2                     | 2.5      | 2.1    | 1.6 | 7.5 (6.2) <sup>d</sup>    | 40.7                       |
| 2     | 26.1                     | 5.5      | 1.2    | 1.2 | 9.3 (7.9)                 | 69.9                       |
| 3     | 33.4                     | 7.5      | 1.1    | 1.0 | 11.0 (9.6)                | 78.3                       |
| 4     | 40.2                     | 8.2      | 1.1    | 0.6 | 11.3 (9.9)                | 82.6                       |
| 5     | 46.5                     | 7.0      | 0.8    | 0.4 | 9.6 (8.2)                 | 85.5                       |
| 6     | 52.3                     | 5.6      | 0.7    | 0.1 | 7.9 (6.4)                 | 87.2                       |
| 7     | 57.4                     | 4.6      | 0.7    | 0.0 | 6.8 (5.3)                 | 87.5                       |

Reaction condition: 1.00 g, 2.5 wt % Cu/h-TS-1, 2.82 mmol C<sub>6</sub>H<sub>6</sub>,  $n_{\text{H}_2\text{O}_2} / n_{\text{C}_6\text{H}_6} = 7$  (molar feed ratio in the reaction zone), 40.00 ml H<sub>2</sub>O, reaction temperature: 70°C, reboiler temperature: 85°C.

Molar ratio<sup>a</sup> is molar feed ratio of aqueous ammonia to benzene in the reaction zone.

<sup>b</sup> Value calculated by (Mole amounts of aniline+ Phenol + DHB + Nitrobenzene) × Initial mole amount of benzene<sup>-1</sup> × 100%

**Table S3. The influence of reaction temperature on the yield and selectivity of products**

| Entry | Reaction temperature(°C) | Y (mol%) |        |     | Conversion of benzene (%) | Selectivity to aniline (%) |
|-------|--------------------------|----------|--------|-----|---------------------------|----------------------------|
|       |                          | Aniline  | Phenol | DHB |                           |                            |
| 1     | 75                       | 6.3      | 1.0    | 0.7 | 9.5 (8.0) <sup>a</sup>    | 78.5                       |
| 2     | 70                       | 8.2      | 1.1    | 0.6 | 11.4(9.9)                 | 82.6                       |
| 3     | 65                       | 10.2     | 1.3    | 0.6 | 13.5 (12.1)               | 83.8                       |
| 4     | 60                       | 12.4     | 1.5    | 0.7 | 15.9 (14.6)               | 84.8                       |
| 5     | 55                       | 10.3     | 1.3    | 0.6 | 13.5 (12.2)               | 84.2                       |
| 6     | 50                       | 9.0      | 1.1    | 0.5 | 11.9 (10.6)               | 84.3                       |
| 7     | 45                       | 7.6      | 0.9    | 0.5 | 10.4 (9.1)                | 84.1                       |
| 8     | 40                       | 6.0      | 0.6    | 0.4 | 8.3 (7.0)                 | 84.7                       |
| 9     | 30                       | 3.5      | 0.3    | 0.4 | 5.5 (4.2)                 | 84.2                       |

Reaction condition: 1.00 g, 2.5 wt % Cu/h-TS-1, 2.82 mmol C<sub>6</sub>H<sub>6</sub>,  $n_{C_6H_6} / n_{NH_3 \cdot H_2O} / n_{H_2O_2} = 1 / 40 / 7$  (molar feed ratio in the reaction zone), 40.00 ml H<sub>2</sub>O, reboiler temperature: 85°C.

<sup>b</sup> Value calculated by (Mole amounts of aniline+ Phenol + DHB + Nitrobenzene) × Initial mole amount of benzene<sup>-1</sup> × 100%

## B. Supplemental image

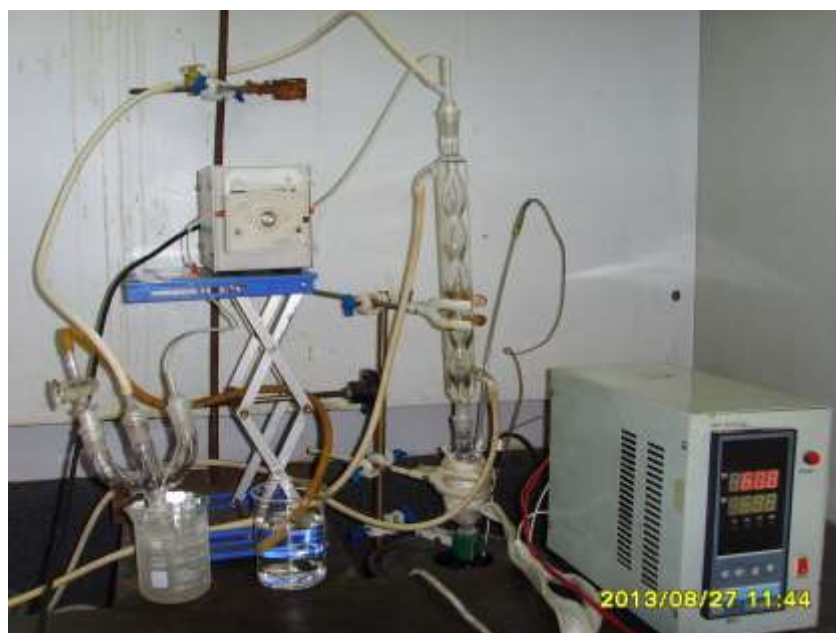

**Figure S1.** Photograph of the Reactive Distillation Column setup.
